# Supplementary material for: Challenges in Transferable Prediction of Solvation Free Energy: A Comparative Analysis of Molecular Representations and Machine Learning Methods
Source: Research Square preprint supplement (doi:10.21203/rs.3.rs-6727155/v1), 2025-07-23
Supplement: Supplementary file 1 [file 04b7335de477dfcd8f4606a2.pdf]

# Challenges in Transferable Prediction of Solvation Free Energy: A Comparative Analysis of Molecular Representations and Machine Learning Methods

Dibyendu Maity and Suman Chakrabarty\*

*Department of Chemical and Biological Sciences, S.N. Bose National Centre for Basic Sciences, Kolkata*

E-mail: sumanc@bose.res.in

## Descriptor Based Models

Table S1: Molecular descriptors with definitions

| Descriptor                           | Description                                                        |
|--------------------------------------|--------------------------------------------------------------------|
| <b>Basic Molecular Properties</b>    |                                                                    |
| Molecular Weight                     | Exact mass of the molecule (in daltons)                            |
| TPSA                                 | Topological Polar Surface Area (in Å <sup>2</sup> )                |
| CrippenClogP                         | Wildman-Crippen octanol-water partition coefficient                |
| Fraction SP3                         | Ratio of sp <sup>3</sup> -hybridized carbon atoms to total carbons |
| <b>Bond and Ring Characteristics</b> |                                                                    |

Continued on next page

Table S1 – continued from previous page

| Descriptor                              | Description                                         |
|-----------------------------------------|-----------------------------------------------------|
| Number of Rotatable Bonds               | Count of non-terminal single bonds excluding amides |
| Number of Rings                         | Total count of all ring systems                     |
| Number of Aromatic Rings                | Count of rings with aromatic character              |
| Number of Aliphatic Rings               | Count of non-aromatic rings                         |
| Number of Saturated Rings               | Count of fully saturated rings                      |
| Number of Bridgehead Atoms              | Atoms shared between rings with $\geq 2$ bonds      |
| <b>Heteroatom and Functional Groups</b> |                                                     |
| Number of Heteroatoms                   | Total non-carbon, non-hydrogen atoms                |
| #O_atoms                                | Total oxygen atoms                                  |
| #N_atoms                                | Total nitrogen atoms                                |
| #F_atoms                                | Total fluorine atoms                                |
| #Cl_atoms                               | Total chlorine atoms                                |
| NumAmideBonds                           | Count of CONH groups                                |
| fr_bicyclic                             | Number of bicyclic rings                            |
| fr_ketone                               | Number of ketones                                   |
| fr_para_hydroxylation                   | Number of para-hydroxylation sites                  |
| fr_sulfone                              | Number of sulfone groups                            |
| <b>Hydrogen Bonding</b>                 |                                                     |
| Number of H-Bond Donors                 | Count of NH or OH groups                            |
| lipinskiHBD                             | Lipinski rule-compliant H-bond donors               |
| <b>Stereochemistry</b>                  |                                                     |
| Number of Atom Stereo Centers           | Total stereocenters (specified + unspecified)       |

Continued on next page

Table S1 – continued from previous page

| Descriptor                      | Description                                                    |
|---------------------------------|----------------------------------------------------------------|
| NumUnspecifiedAtomStereoCenters | Stereocenters without defined configuration                    |
| <b>Other Indices</b>            |                                                                |
| hallKierAlpha                   | Hall-Kier alpha value (Rev. Comp. Chem. 2, 367–422, 1991)      |
| kappa1–3                        | Hall-Kier shape indices $\kappa_1$ – $\kappa_3$                |
| MaxEStateIndex                  | Maximum EState index                                           |
| MinEStateIndex                  | Minimum EState index                                           |
| MinAbsEStateIndex               | Minimum absolute EState index                                  |
| qed                             | Quantitative estimate of drug-likeness                         |
| MaxAbsPartialCharge             | Maximum absolute Gasteiger atomic charge                       |
| FpDensityMorgan1                | Morgan fingerprint density, radius 1                           |
| BalabanJ                        | Chemical distance-based topological index                      |
| Chi4v                           | Valence molecular connectivity index                           |
| Chi4n                           | Variant of Chi4v using nVal                                    |
| Kappa3                          | Third-order shape/connectivity index                           |
| SlogP_VSAN, N = 4, 5, 8, 11     | MOE-type descriptors using LogP and surface area contributions |

## Model Description: Graph Convolutional Network - Variational Autoencoder (GCN-VAE)

### Model Architecture:

The GCN-VAE model handles molecular graphs( $\text{dgl}^1$ ) from SMILES strings through two key components: the Encoder and the Decoder.

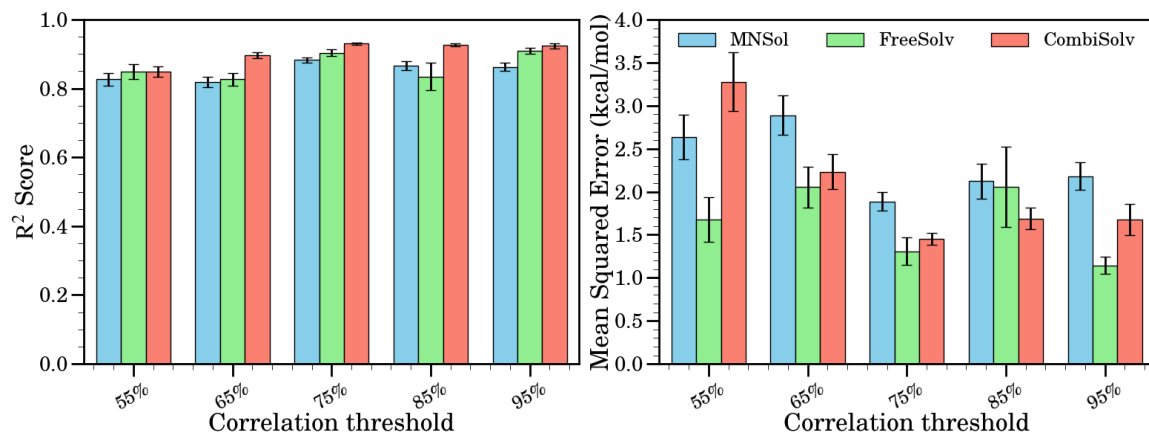

Figure S1: By varying the threshold value of correlation criteria we found optimal number of features to form feature vector. A XGBoost model was used to evaluate the efficiency of the representations. 10-fold cross validation was employed for reliable statistics. The standard error in measurement is provided.

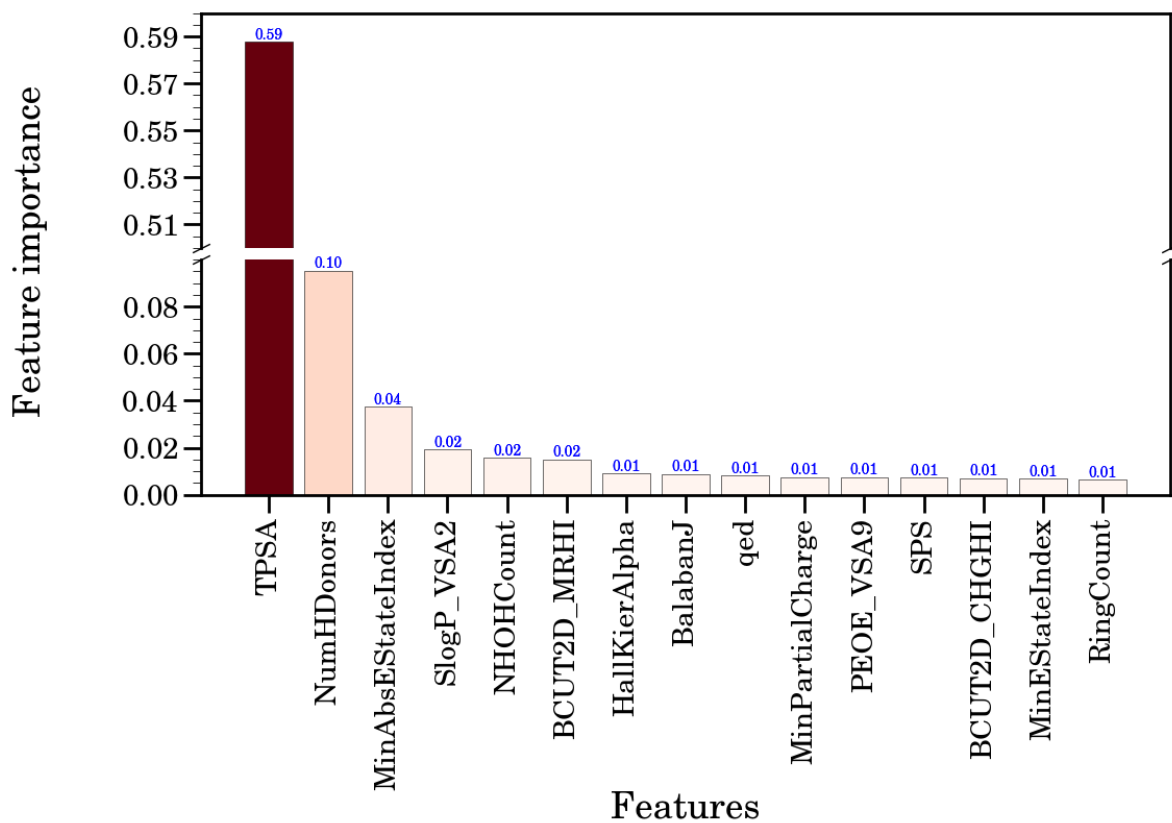

Figure S2: Relative importance of the features in terms of Gini score. TPSA has the most contribution towards the predictability of the model, followed by number of hydrogen bond donors.

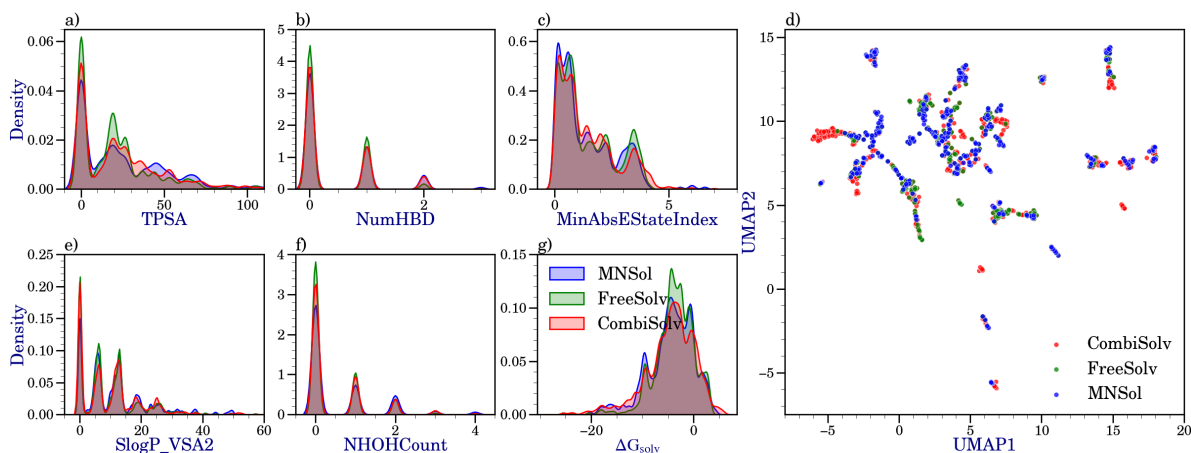

Figure S3: Distribution plots of key features contributing to the feature vector for analyzing transferability issues. (a)–(c) and (e)–(f) show the distributions of important features, while (g) presents the distribution of the target property, free energy of solvation ( $\Delta G_{solv}$ ) for each dataset considered. (d) displays a lower-dimensional projection of high-dimensional feature vectors, generated using UMAP and plotted along two UMAP embedding axes to visualize the data spread and clustering patterns.

The Encoder utilizes multiple Relational Graph Convolutional Layers (R-GCN)<sup>2</sup> followed by dense layers. The R-GCN captures atom and bond relationships, assigning distinct weight matrices for different bond types. A global average pooling layer aggregates node features into a single vector, which is then passed through dense layers to produce the latent space parameters—mean ( $z_{mean}$ ) and log variance ( $log\_var$ ).

The Decoder reconstructs the adjacency matrix and node features from the latent vector. Dense layers process the latent representation, and two output layers generate the adjacency matrix and node features. Softmax activation ensures valid probability distributions for these outputs.

### Loss Function:

The total loss comprises multiple components: adjacency and feature reconstruction losses (measured using cross-entropy), KL divergence loss (to enforce a standard normal distribution in the latent space), and binary cross-entropy loss for molecular property prediction. An optional gradient penalty may be included for regularization and training stability.

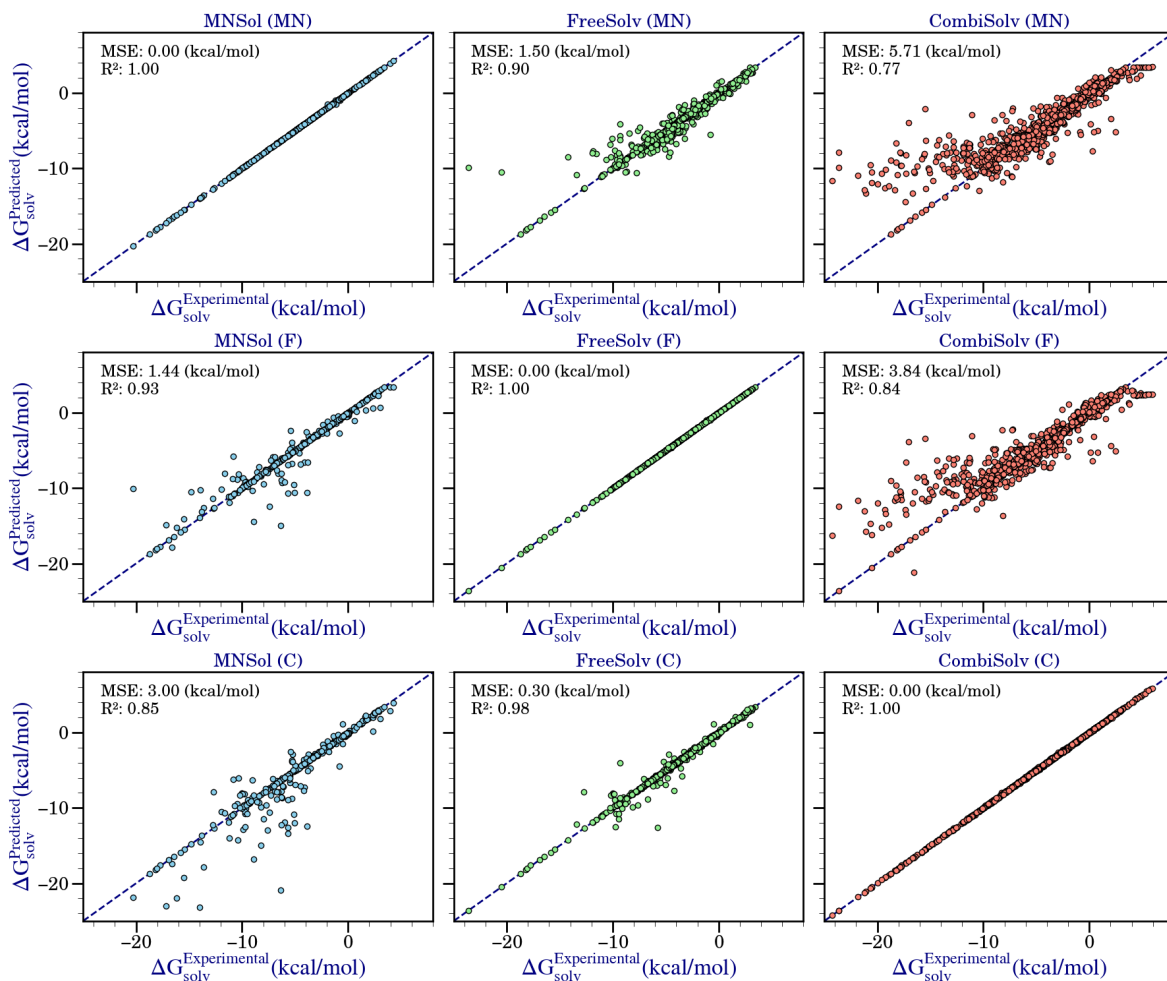

Figure S4: Popular ML models often overfit to training data, leading to reduced performance on evaluation datasets. Here, the XGBoost model is trained on each dataset (rows) and tested on the other two datasets (columns) to assess its generalization ability.

### Hyperparameters:

The model is defined by several hyperparameters, including the maximum number of atoms (NUM\_ATOMS), bond types (BOND\_DIM), atom feature dimensions (ATOM\_DIM), graph convolution output sizes (gconv\_units), dense layer dimensions (dense\_units), latent space dimension (latent\_dim), dropout rate (dropout\_rate), training epochs (epochs), and optimizer learning rate (learning\_rate).

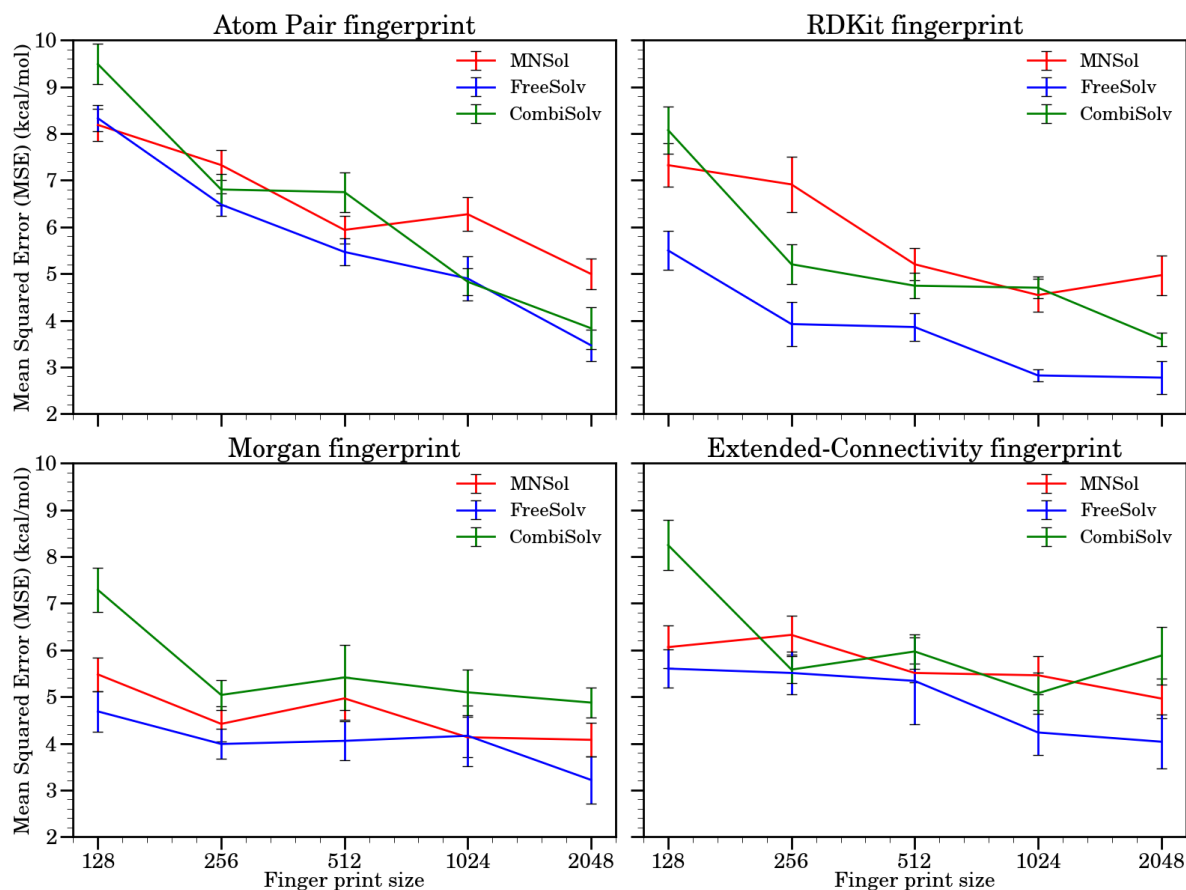

Figure S5: By varying the bit size of the fingerprints we found optimal size of fingerprints. A XGBoost model was used to evaluate the efficiency of the FPs. 10-fold cross validation was employed for reliable statistics. The standard error in measurement is provided in terms of error bar.

## Training Loop

The training process begins with a forward pass to generate the latent vector, adjacency matrix, and node features. Loss components are computed and combined, followed by a backward pass to calculate gradients. Model parameters are updated through an optimization step. Validation is conducted regularly to assess generalization on unseen data.

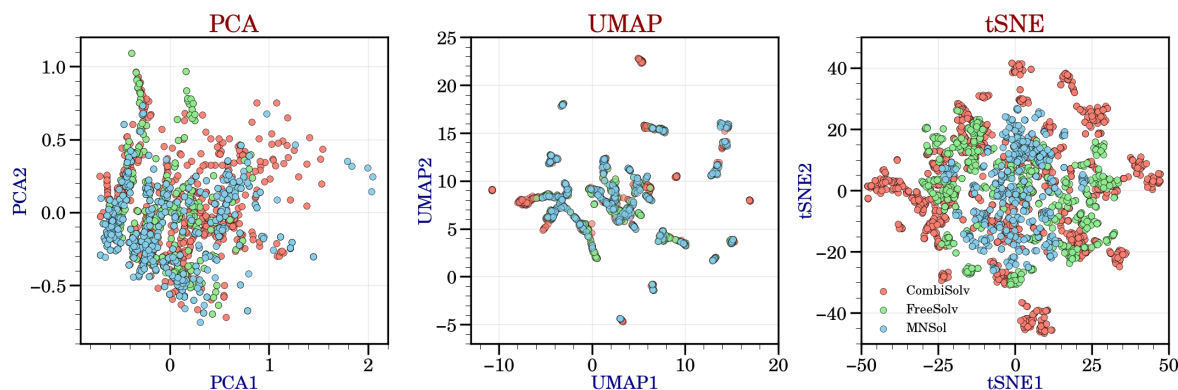

Figure S6: Molecular entries(represented in terms of descriptor) in the 2D space of PCA, UMAP and tSNE.

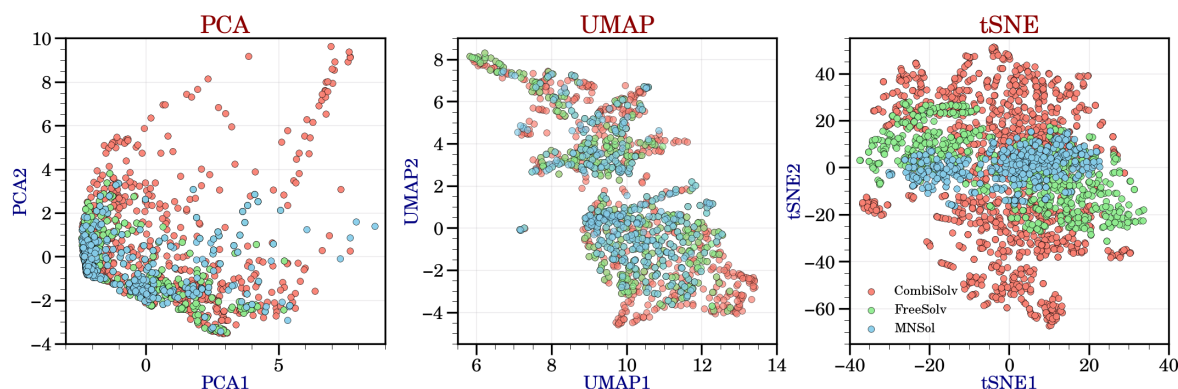

Figure S7: Molecular entries(represented in terms of atom-pair fingerprints) in the 2D space of PCA, UMAP and tSNE.

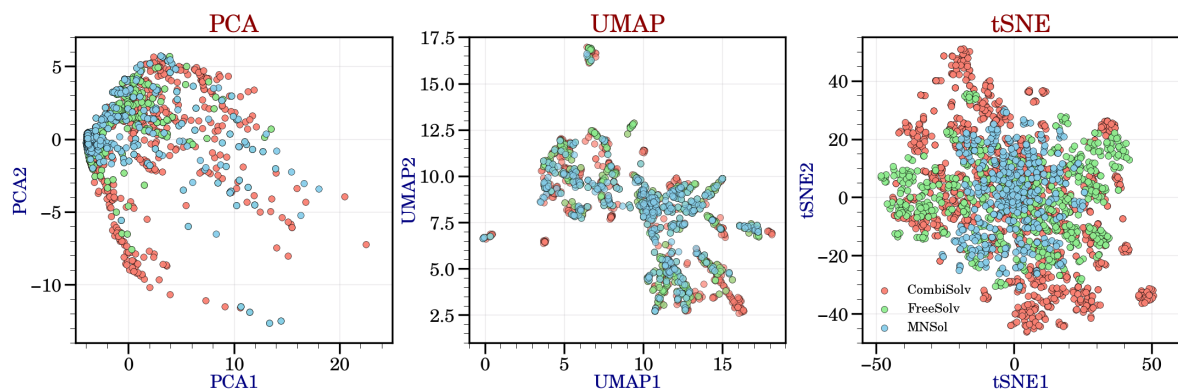

Figure S8: Molecular entries(represented in terms of RDKit fingerprints) in the 2D space of PCA, UMAP and tSNE.

## Dimensionality reduction of feature space

## References

- (1) Wang, M.; Zheng, D.; Ye, Z.; Gan, Q.; Li, M.; Song, X.; Zhou, J.; Ma, C.; Yu, L.; Gai, Y.; Xiao, T.; He, T.; Karypis, G.; Li, J.; Zhang, Z. Deep Graph Library: A



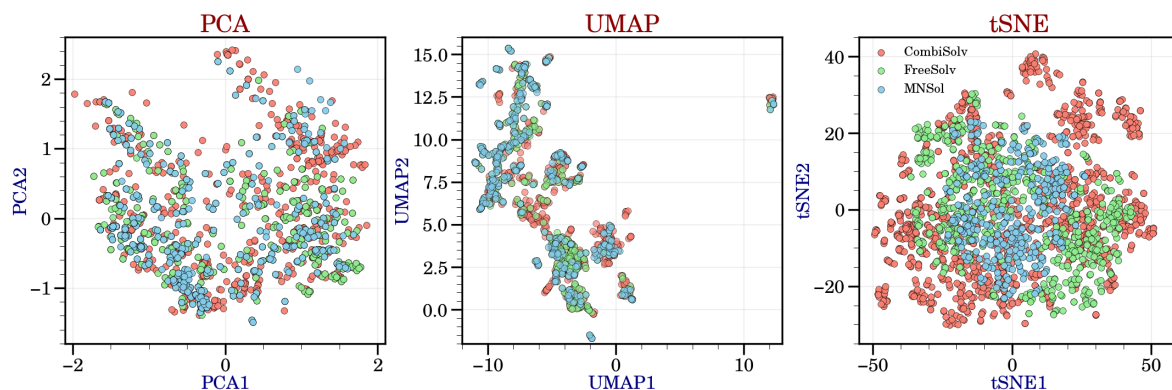

Figure S9: Molecular entries(represented in terms of Morgan fingerprints) in the 2D space of PCA, UMAP and tSNE.

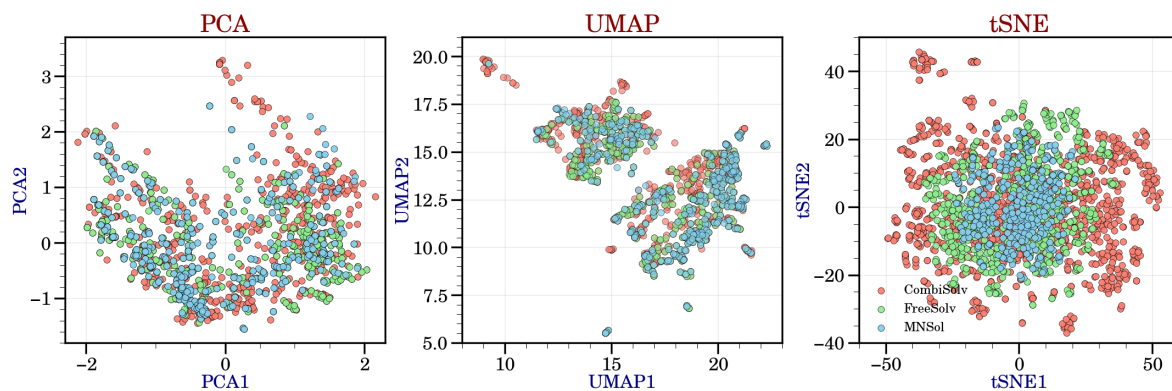

Figure S10: Molecular entries(represented in terms of extended connectivity fingerprints(ECFPs)) in the 2D space of PCA, UMAP and tSNE.

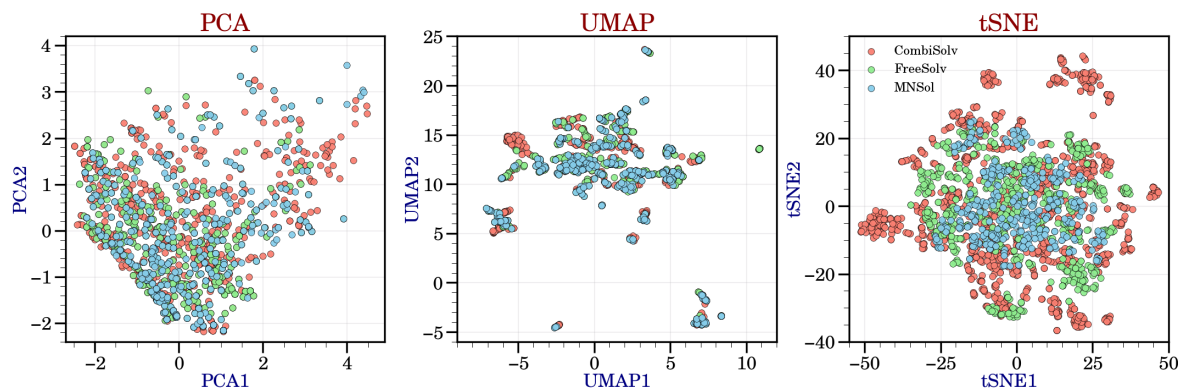

Figure S11: Molecular entries(represented in terms of MACCS keys) in the 2D space of PCA, UMAP and tSNE.

Graph-Centric, Highly-Performant Package for Graph Neural Networks. *arXiv preprint arXiv:1909.01315* **2019**,

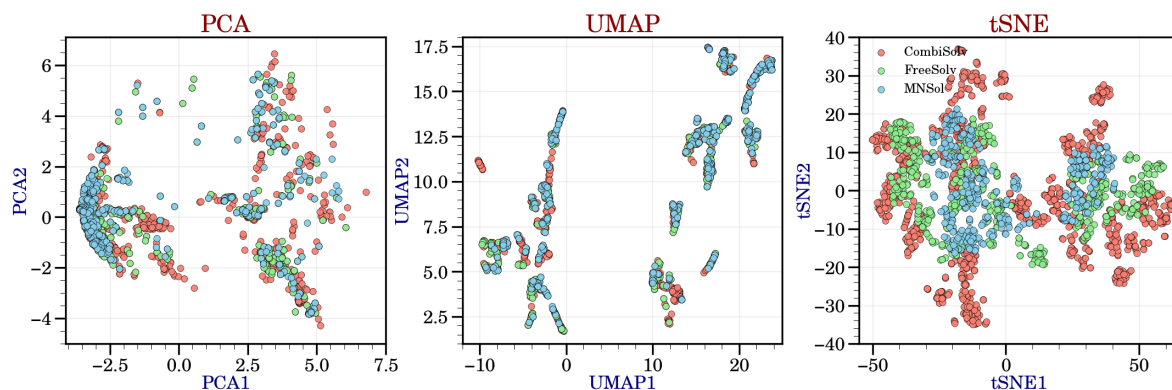

Figure S12: Molecular entries(represented in terms of PubChem keys) in the 2D space of PCA, UMAP and tSNE(color codes follow the legend of last subplot).

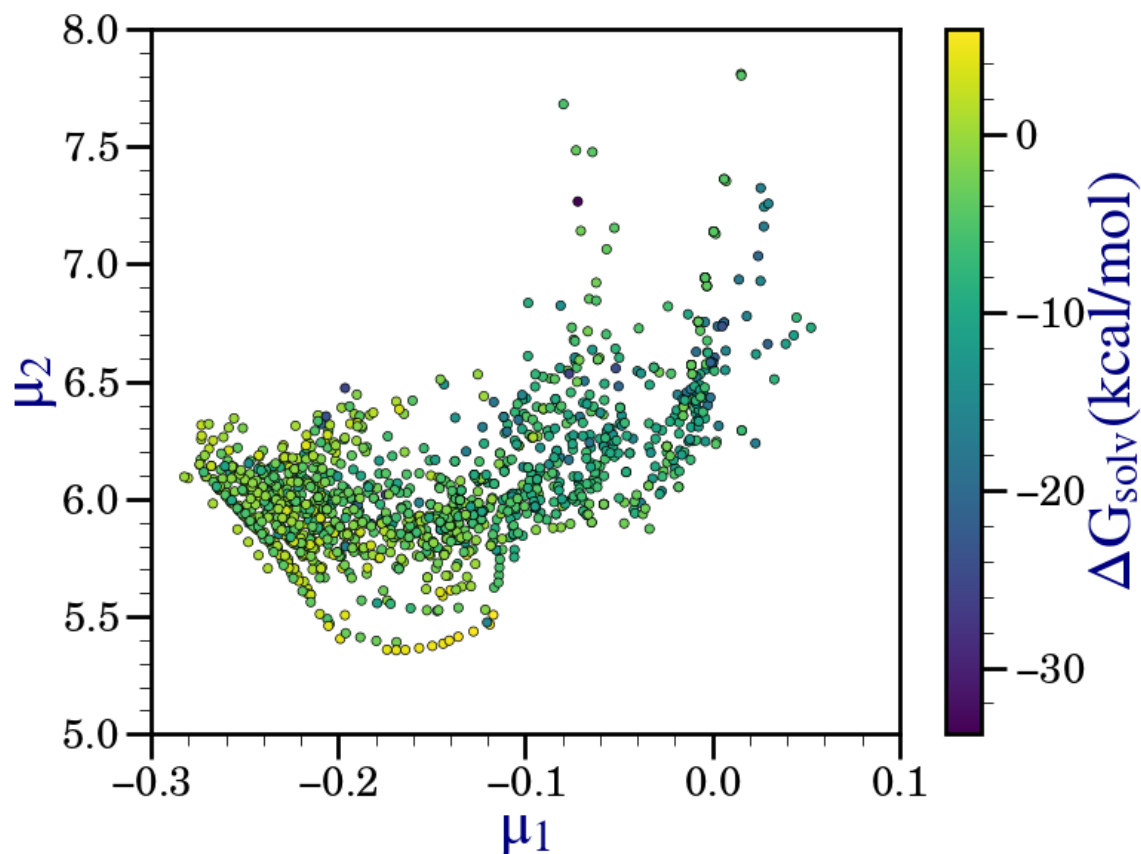

Figure S13: Molecular entries in the 2D latent space of trained GCN-VAE(merged dataset). Molecules are colored by the value of their free energy of solvation.

- (2) Schlichtkrull, M.; Kipf, T. N.; Bloem, P.; Berg, R. v. d.; Titov, I.; Welling, M. Modeling Relational Data with Graph Convolutional Networks. 2017; <https://arxiv.org/abs/>

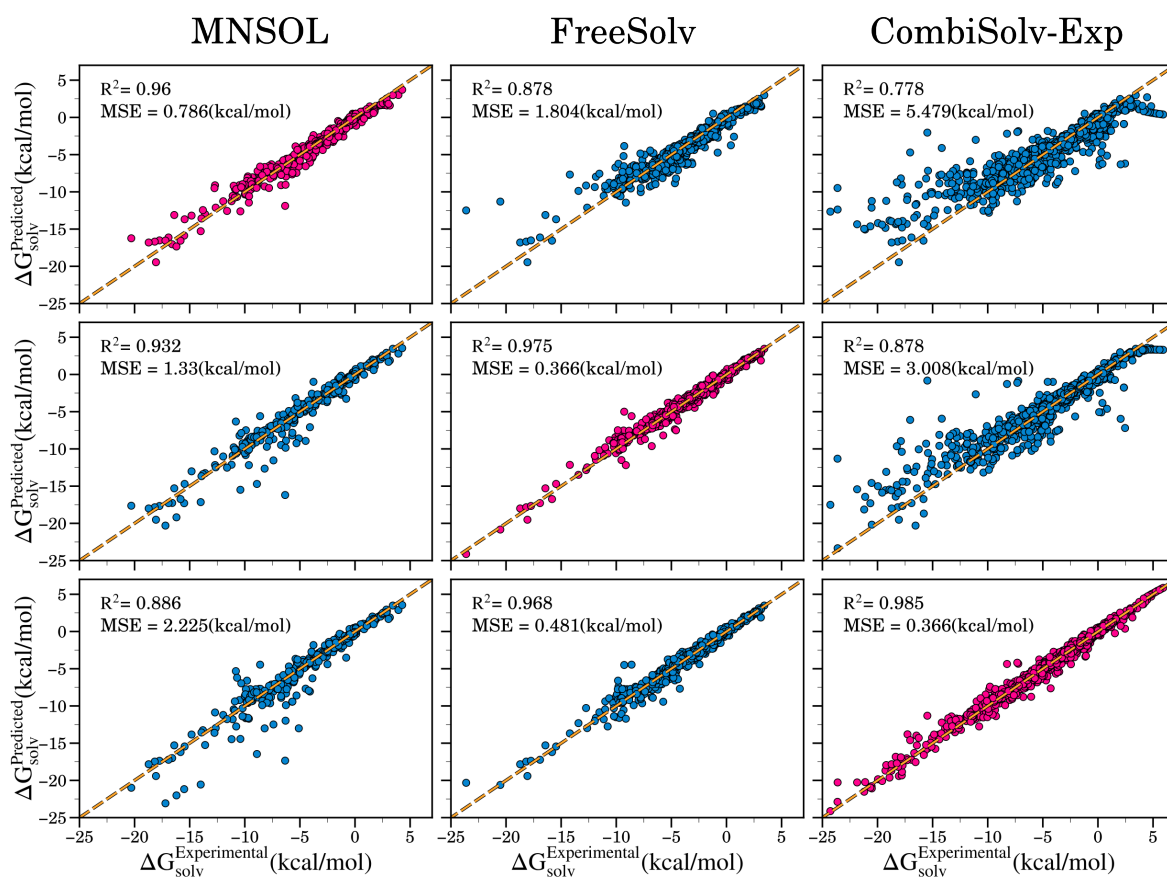

Figure S14: Dataset dependency of CIGIN model. Each column represents a dataset, while each row corresponds to a model trained on the same dataset. In the top panel, the CIGIN model is trained on the MNSol dataset and tested on the other two datasets. The middle panel shows the model trained on FreeSolv, and in the lower panel, the model is trained on CombiSolv before being tested across datasets.

1703.06103.

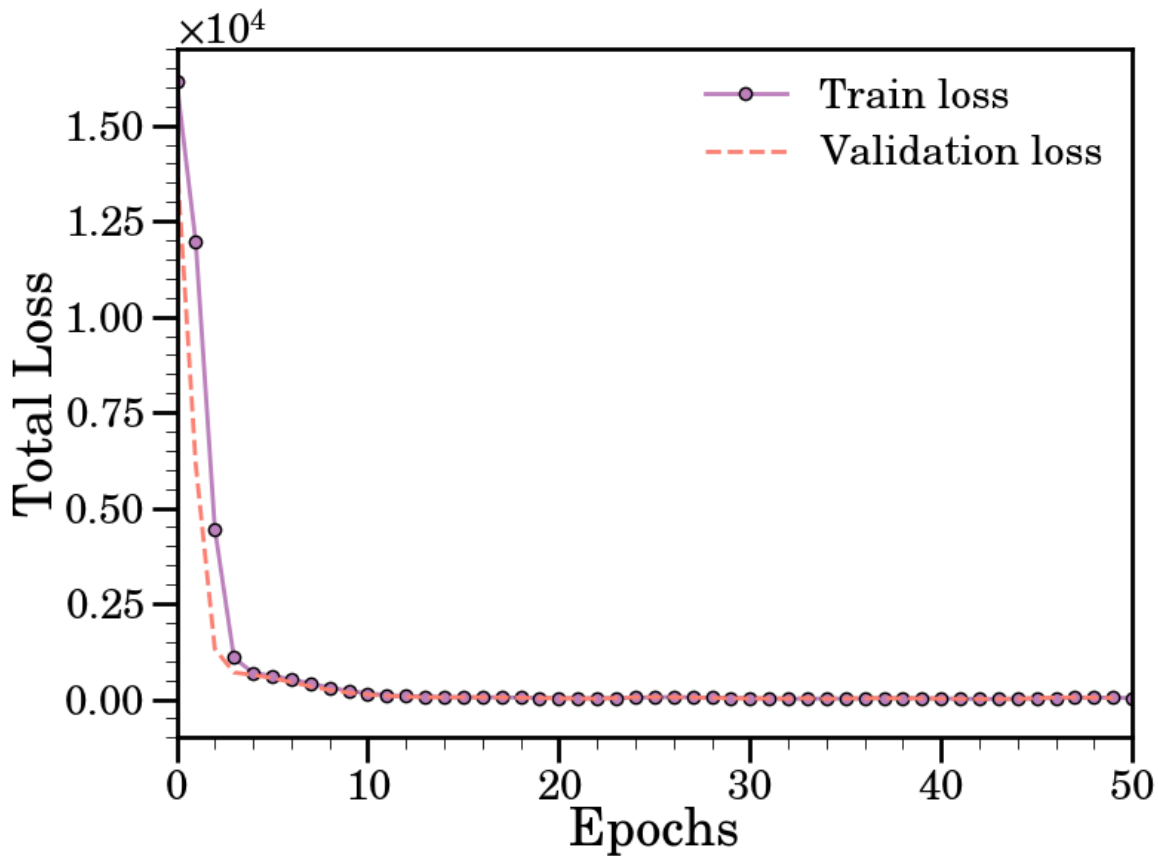

Figure S15: Loss function vs epoch for GCN-VAE showing steady convergence.

Table S2: Trained MLP regressor(MLPR), XGBoost regressor(XGBR) and Random forest regressor(RFR) on FreeSolv dataset.

| Fingerprint | MLPR           |      | RFR            |      | XGBR           |      |
|-------------|----------------|------|----------------|------|----------------|------|
|             | R <sup>2</sup> | MSE  | R <sup>2</sup> | MSE  | R <sup>2</sup> | MSE  |
| AP          | 0.751          | 2.93 | 0.633          | 3.41 | 0.719          | 3.19 |
| RDKit       | 0.741          | 2.70 | 0.743          | 3.01 | 0.762          | 2.62 |
| Morgan      | 0.771          | 2.73 | 0.541          | 4.43 | 0.786          | 2.56 |
| ECFP        | 0.573          | 4.21 | 0.344          | 5.86 | 0.666          | 3.33 |
| MACCS       | 0.920          | 1.20 | 0.868          | 1.63 | 0.910          | 1.14 |
| PubChem     | 0.910          | 1.22 | 0.857          | 1.82 | 0.910          | 1.14 |

Table S3: Trained MLP regressor(MLPR), XGBoost regressor(XGBR) and Random forest regressor(RFR) on CombiSolv dataset.

| Fingerprint | MLP   |      | RFR   |      | XGB   |      |
|-------------|-------|------|-------|------|-------|------|
|             | $R^2$ | MSE  | $R^2$ | MSE  | $R^2$ | MSE  |
| AP          | 0.854 | 2.77 | 0.763 | 4.36 | 0.847 | 3.19 |
| RDKit       | 0.822 | 3.36 | 0.824 | 3.25 | 0.837 | 3.71 |
| Morgan      | 0.847 | 3.04 | 0.707 | 5.45 | 0.778 | 4.29 |
| ECFP        | 0.766 | 4.14 | 0.648 | 6.28 | 0.765 | 4.69 |
| MACCS       | 0.921 | 1.78 | 0.893 | 2.22 | 0.914 | 1.83 |
| PubChem     | 0.911 | 1.87 | 0.884 | 2.28 | 0.914 | 1.83 |

Table S4: The atom (node) features used for molecular graph representation

| Atom Feature        | Description                                                                              |
|---------------------|------------------------------------------------------------------------------------------|
| Atom Type           | Element identity (H, C, N, O, F, etc.) represented using one-hot encoding                |
| Implicit Valence    | Presence of implicit valence electrons (Binary)                                          |
| Radical Electrons   | Presence of radical electrons (Binary)                                                   |
| Chirality           | Chirality configuration: R, S, or None (one-hot)                                         |
| Number of Hydrogens | Number of neighboring hydrogen atoms (one-hot)                                           |
| Hybridization       | Hybridization state: sp, sp <sup>2</sup> , sp <sup>3</sup> , sp <sup>3</sup> d (one-hot) |
| Acidic              | Atom is acidic in nature (Binary)                                                        |
| Basic               | Atom is basic in nature (Binary)                                                         |
| Aromatic            | Atom is part of an aromatic group (Binary)                                               |
| Donor               | Donates electrons (Binary)                                                               |
| Acceptor            | Accepts electrons (Binary)                                                               |

Table S5: The bond (edge) features used for molecular representation

| Bond Feature           | Description                                                   |
|------------------------|---------------------------------------------------------------|
| Bond Type              | Bond order: single, double, triple, or aromatic (one-hot)     |
| Bond is in Conjugation | Indicates if the bond is part of a conjugated system (Binary) |
| Bond is in Ring        | Indicates if the bond is part of a ring structure (Binary)    |
| Bond Chirality         | Stereochemistry of bond: E or Z (one-hot)                     |
